# Supplementary material for: Identifying hotspots of greenhouse gas emissions from drained peatlands in the European Union
Source: Research Square preprint supplement (doi:10.21203/rs.3.rs-4629642/v1), 2024-07-04
Supplement: Supplementary file 1 [file 5d8199ec9887508d9d038299.docx]

Overlaying the land use map for peatlands with this productivity map resulted in the mean and standard deviation productivity index per country as shown in Table S1. Here only for the countries where information in the NIR reporting was available about the deviation of shallow and deep where evaluated. The mean productivity index (PI) for grassland is 6.321 and for forestland 6.079. It can be observed that the PI for countries in colder climates (towards boreal) have a lower PI than the countries towards more temperate climatic conditions.

*Table S.2: Mean productivity index (PI) per country based on the two land use classes grassland and forestland with corresponding standard deviation.*

|  | ***Grassland*** | | ***Forestland*** | |
| --- | --- | --- | --- | --- |
| ***Countries*** | *Mean*  *(PI)* | *Std.dev*  *(PI)* | *Mean*  *(PI)* | *Std.dev*  *(PI)* |
| *Sweden* | *4.13* | *2.25* | *5.93* | *0.81* |
| *Lithuania* | *5.01* | *1.07* | *4.86* | *0.74* |
| *Hungary* | *5.48* | *0.86* | *5.43* | *0.75* |
| *Finland* | *5.56* | *1.12* | *5.00* | *1.84* |
| *France* | *5.91* | *1.78* | *6.26* | *1.56* |
| *Slovakia* | *5.96* | *0.69* | *5.78* | *0.97* |
| *Austria* | *6.01* | *1.55* | *6.10* | *1.40* |
| *Ireland* | *6.52* | *2.25* | *6.49* | *2.04* |
| *Czech* | *6.73* | *0.51* | *6.69* | *0.24* |
| *Denmark* | *6.98* | *1.14* | *6.75* | *1.11* |
| *Germany* | *7.20* | *1.24* | *6.86* | *1.02* |
| *Netherlands* | *8.01* | *1.65* | *7.16* | *1.54* |
| *Latvia* | *8.67* | *2.08* | *5.74* | *1.06* |
| ***Average*** | *6.32* | *1.41* | *6.08* | *1.16* |
