# Supplementary material for: Identifying hotspots of greenhouse gas emissions from drained peatlands in the European Union
Source: Research Square preprint supplement (doi:10.21203/rs.3.rs-4629642/v1), 2024-07-04
Supplement: Supplementary file 2 [file 70f355483919e5588222283b.xlsx]

## Sheet: Supplement S.4
				Forestland
				NIS 2023			This Study			NIS 2023			This study			Used hotpot Emissions
			Country	Area [kha]	%	%cum	Area [kha]	%	%cum	Emissions [kt]	%	%cum	Emissions [kt]	%	%cum	Emissions [kt]	%	%cum	Ratio
			United Kingdom	465.06	6.29541	6.29541	346.534	6.55518	6.55518	2479.25	9.44275	9.44275	3902.6	5.29621	5.29621	2479.25	4.72023	4.72023	0.635282
			Germany	278.08	3.7643	10.0597	366.283	6.92876	13.4839	771.193	2.93725	12.38	5277.1	7.16154	12.4577	4006.35	7.62765	12.3479	0.759195
			Poland	340.455	4.60867	14.6684	522.858	9.89059	23.3745	777.526	2.96137	15.3414	10783.7	14.6345	27.0923	7021.73	13.3686	25.7165	0.651143
			Finland	4276	57.8832	72.5516	1073.27	20.3024	43.677	8200	31.2314	46.5728	7781.4	10.5601	37.6524	8200	15.6119	41.3284	1.05379
			Estonia	288.03	3.899	76.4506	653.34	12.3589	56.0358	1011.25	3.85156	50.4244	10582.7	14.3618	52.0142	4665.46	8.88253	50.2109	0.440857
			Latvia	375.12	5.07791	81.5285	340.041	6.43235	62.4682	1622	6.17773	56.6021	4925.4	6.68425	58.6984	5433.51	10.3448	60.5557	1.10316
			Denmark	18.65	0.252461	81.781	32.1118	0.60744	63.0756	221.487	0.84358	57.4457	496.5	0.673799	59.3722	221.487	0.421687	60.9774	0.446097
			Norway	241	3.26236	85.0433	577.003	10.9148	73.9904	1443.74	5.49878	62.9444	5045.3	6.84696	66.2192	1443.74	2.74872	63.7261	0.286155
			Ireland	287.79	3.89575	88.9391	219.042	4.14348	78.1339	1887.76	7.18993	70.1344	3010.6	4.08568	70.3048	1887.76	3.59409	67.3202	0.627038
			Lithuania	153.92	2.08358	91.0227	236.916	4.4816	82.6155	378.874	1.44302	71.5774	6126.4	8.31412	78.619	3980.21	7.57789	74.8981	0.649682
			Romania	2.546	0.0344646	91.0571	189.252	3.57998	86.1955	24.2719	0.0924445	71.6698	2444.8	3.31783	81.9368	2444.8	4.65463	79.5527	1
			Netherlands	4.53	0.0613216	91.1184	15.3859	0.291045	86.4865	76.0451	0.289634	71.9595	209.5	0.284312	82.2211	76.0451	0.144782	79.6975	0.362984
			Hungary	6.464	0.0875017	91.2059	59.6909	1.12914	87.6157	61.6235	0.234706	72.1942	790.6	1.07292	83.294	790.6	1.50522	81.2027	1
			Sweden	1000.02	13.537	104.743	328.538	6.21476	93.8304	7376.47	28.0948	100.289	6029.5	8.18262	91.4767	7376.47	14.044	95.2467	1.2234
			France	-	-	99.7964	38.5292	0.728835	94.5593	-78.4923	-0.298955	99.9901	468	0.635122	92.1118	468	0.891021	96.1378	1
			Belgium	-	-	99.7964	25.1686	0.476099	95.0354	0	0	99.9901	385.4	0.523025	92.6348	385.4	0.733759	96.8715	1
			Italy	-	-	99.7964	70.4527	1.33271	96.3681	0	0	99.9901	614.8	0.834344	93.4691	614.8	1.17051	98.042	1
			Iceland	4.14106	0.0560566	99.8524	98.8412	1.86972	98.2378	1.38749	0.00528455	99.9954	169.2	0.229621	93.6988	1.38749	0.00264163	98.0447	0.00820031
			Slovakia	-	-	99.8269	28.4668	0.53849	98.7763	0	0	99.9954	337.4	0.457885	94.1566	337.4	0.642373	98.687	1
			Greece	-	-	99.8269	0.822735	0.0155632	98.7919	0	0	99.9954	10.5	0.0142495	94.1709	10.5	0.0199909	98.707	1
			Albania	-	0	99.8269	1.77372	0.0335524	98.8254	-	-	99.9954	18.8	0.0255134	94.1964	18.8	0.0357931	98.7428	1
			Bosnia and Herzegovina	-	0	99.8269	2.08928	0.0395217	98.8649	-	-	99.9954	-	-	99.0084	-	-	98.6521	-
			Austria	-	-	99.8269	6.64169	0.125637	98.9906	0	0	99.9954	85.6	0.116168	99.1245	85.6	0.162973	98.8151	1
			Czech Republic	18.665	0.252664	100.08	19.5729	0.370249	99.3608	-	-	99.9954	258.6	0.350945	99.4755	258.6	0.492346	99.3075	1
			Serbia	-	0	100.08	13.1846	0.249406	99.6102	-	-	99.9954	113.1	0.153488	99.629	113.1	0.21533	99.5228	1
			Spain	-	-	99.9646	6.35287	0.120173	99.7304	0	0	99.9954	59	0.0800688	99.709	59	0.11233	99.6351	1
			North Macedonia	-	0	99.9646	0.558461	0.0105641	99.741	-	-	99.9954	10.6	0.0143852	99.7234	10.6	0.0201812	99.6553	1
			Switzerland	1.16	0.0157027	99.9803	2.64712	0.050074	99.791	1.21999	0.00464657	100	36.1	0.0489912	99.7724	1.21999	0.00232272	99.6576	0.0337946
			Croatia	-	-	99.9943	1.49419	0.0282646	99.8193	0	0	100	18.2	0.0246992	99.7971	18.2	0.0346508	99.6923	1
			Montenegro	-	0	99.9943	1.44074	0.0272537	99.8466	-	-	100	17.9	0.024292	99.8214	17.9	0.0340796	99.7264	1
			Luxembourg	-	-	99.9943	0.418631	0.007919	99.8545	0	0	100	7.1	0.00963539	99.831	7.1	0.0135176	99.7399	1
			Slovenia	0.77572	0.0105007	100.005	2.64009	0.0499411	99.9044	0	0	100	31.1	0.0422057	99.8732	31.1	0.059211	99.7991	1
			Bulgaria	-	-	100	4.26974	0.0807682	99.9852	0	0	100	49.6	0.067312	99.9405	49.6	0.094433	99.8935	1
			Portugal	-	-	100	0.531509	0.0100542	99.9952	0	0	100	6.5	0.00882113	99.9494	6.5	0.0123753	99.9059	1
			Liechtenstein		-	100	0.0121249	0.000229359	99.9955	0	0	100	0.2	0.00027142	99.9496	0.2	0.000380778	99.9063	1
			Andorra	-	0	100	0.145083	0.00274444	99.9982	-	-	100	0.8	0.00108568	99.9507	0.8	0.00152311	99.9078	1
			Cyprus	-	-	100	0.0942681	0.00178321	100	0	0	100	0.8	0.00108568	99.9518	0.8	0.00152311	99.9093	1
			Total	7387.29	100	100	5286.41	100	100	26255.6	100	100	73686.7	100	100	52524	100	100	0.712802
