# Supplementary material for: Identifying hotspots of greenhouse gas emissions from drained peatlands in the European Union
Source: Research Square preprint supplement (doi:10.21203/rs.3.rs-4629642/v1), 2024-07-04
Supplement: Supplementary file 3 [file 749400448587be72fa1e7a19.xlsx]

## Sheet: Supplement S.3
				Agricultural crops (Grassland & Cropland)
				NIS 2023			Martin and Couwenberg			This Study			NIS 2023			Martin & Couwenberg			This study			Used hotpot Emissions
			Country	Area [kha]	%	%cum	Area [kha]	%	%cum	Area [kha]	%	%cum	Emissions [kt]	%	%cum	Emissions [kt]	%	%cum	Emissions [kt]	%	%cum	Emissions [kt]	%	%cum	Ratio
			United Kingdom	1668.55	27.01	27.01	760.68	12.4637	12.4637	1413.25	20.9842	20.9842	13194.1	10.7948	10.7948	14756.2	8.92345	8.92345	48443.8	20.9528	20.9528	14756.2	7.48085	7.48085	0.304604
			Germany	1296.46	20.9867	47.9968	1312.62	21.5072	33.9709	1409.26	20.9249	41.9092	45894.6	37.5489	48.3437	38418.7	23.2328	32.1563	50423.7	21.8091	42.7619	45894.6	23.2669	30.7478	0.91018
			Poland	957.415	15.4983	63.4951	921.79	15.1035	49.0744	1099	16.3182	58.2273	8856.3	7.24582	55.5895	26339.4	15.9281	48.0844	34502.6	14.923	57.6849	34502.6	17.4916	48.2393	1
			Finland	342.249	5.54022	69.0353	329.42	5.39753	54.4719	188.725	2.80222	61.0296	8157.45	6.67405	62.2635	9203.99	5.5659	53.6503	5470.05	2.36589	60.0508	9203.99	4.66609	52.9054	1.68261
			Lithuania	134.198	2.17236	71.2077	283.4	4.6435	59.1154	260.261	3.8644	64.894	766.801	0.627361	62.8909	6091.22	3.68352	57.3338	14686.2	6.35203	66.4028	6091.22	3.08803	55.9934	0.414759
			Estonia	83.365	1.34949	72.5572	245.9	4.02906	63.1445	237.322	3.5238	68.4178	841.058	0.688115	63.579	4450.15	2.69113	60.025	6786.64	2.93534	69.3382	6786.64	3.44058	59.434	1
			Latvia	166.304	2.69208	75.2493	158.32	2.59407	65.7386	161.8	2.40244	70.8202	4004.07	3.27594	66.8549	5054.25	3.05644	63.0814	4690.78	2.02884	71.367	5054.25	2.56232	61.9963	1.07749
			Denmark	172.124	2.78628	78.0356	179.04	2.93356	68.6721	175.015	2.59866	73.4189	7146.92	5.84729	72.7022	6115.42	3.69816	66.7796	5459.33	2.36126	73.7283	5459.33	2.76768	64.764	1
			Norway	70.1524	1.1356	79.1712	-	0	68.6721	72.7701	1.0805	74.4994	2276.83	1.8628	74.565	-	-	66.7796	3933.05	1.70111	75.4294	3933.05	1.99392	66.7579	1
			Ireland	338.937	5.4866	84.6578	332.9	5.45455	74.1267	512.921	7.61594	82.1153	7547.16	6.17474	80.7398	5891.82	3.56294	70.3425	16685.2	7.21665	82.646	7547.16	3.82614	70.5841	0.452326
			Romania	8.28075	0.134046	71.3418	626.19	10.2601	69.3755	442.124	6.56474	71.4587	229.264	0.187573	63.0785	20019.3	12.1062	69.44	13550.8	5.86095	72.2638	13550.8	6.86976	62.8632	1
			Netherlands	340.725	5.51555	76.8573	338.2	5.54139	74.9169	237.292	3.52336	74.9821	7841.55	6.41559	69.494	9685.29	5.85696	75.297	7987.82	3.45487	75.7187	9685.29	4.91009	67.7733	1.21251
			Hungary	0	0	76.8573	55.74	0.913297	75.8302	183.781	2.72882	77.7109	0	0	69.494	2018.47	1.22062	76.5176	5873.04	2.54019	78.2588	5873.04	2.97742	70.7507	1
			Sweden	165.331	2.67632	79.5336	164.73	2.69909	78.5293	38.3656	0.56966	78.2805	5469.41	4.47482	73.9689	4384.33	2.65132	79.1689	1974.46	0.853989	79.1128	4384.33	2.2227	72.9734	2.22052
			France	12.8718	0.208364	79.742	139.06	2.27849	80.8078	53.5473	0.79508	79.0756	29.0521	0.0237691	73.9926	4557.44	2.75601	81.9249	1643.26	0.710741	79.8236	4557.44	2.31046	75.2839	2.77341
			Belgium	2.72	0.0440305	79.786	15.4	0.252328	81.0601	39.7645	0.590431	79.666	88.9132	0.0727447	74.0654	433.71	0.262276	82.1872	1350.12	0.58395	80.4075	1350.12	0.684461	75.9683	1
			Italy	24.2852	0.393122	80.1791	23.2	0.380131	81.4403	40.4224	0.6002	80.2662	990.041	0.810006	74.8754	840.21	0.508098	82.6953	1565.27	0.677009	81.0845	1565.27	0.793538	76.7619	1
			Iceland	347.305	5.62206	85.8012	-	0	81.4403	51.2876	0.761528	81.0278	7222	5.90871	80.7841	-	-	82.6953	2811.86	1.21618	82.3007	7222	3.6613	80.4232	2.56841
			Slovakia	0	0	85.8012	11.5	0.188427	81.6287	23.3834	0.347202	81.375	0	0	80.7841	367.52	0.222249	82.9175	597.436	0.258402	82.5591	597.436	0.302879	80.726	1
			Greece	6.6645	0.107883	85.9091	6.66	0.109124	81.7378	17.7612	0.263722	81.6387	280.308	0.229335	81.0134	247.57	0.149712	83.0673	684.256	0.295953	82.8551	684.256	0.346893	81.0729	1
			Albania	-	0	85.9091	-	0	81.7378	17.4342	0.258866	81.8976	-	-	81.0134	-	-	83.0673	577.991	0.249991	83.1051	577.991	0.293021	81.366	1
			Bosnia and Herzegovina	-	0	85.9091	-	0	81.7378	11.6437	0.172887	82.0705	-	-	81.0134	-	-	83.0673	275.384	0.119108	83.2242	275.384	0.13961	81.5056	1
			Austria	12.954	0.209695	86.1188	100	1.6385	83.3763	9.58489	0.142318	82.2128	375.711	0.307389	81.3208	3387.86	2.04873	85.116	275.91	0.119336	83.3435	3387.86	1.71752	83.2231	12.2789
			Czech Republic	0	0	86.1188	4.25	0.0696361	83.446	7.96079	0.118203	82.331	0	0	81.3208	113.78	0.0688058	85.1848	215.577	0.093241	83.4367	215.577	0.10929	83.3324	1
			Serbia	-	0	86.1188	-	0	83.446	9.86669	0.146502	82.4775	-	-	81.3208	-	-	85.1848	142.107	0.0614636	83.4982	142.107	0.0720429	83.4044	1
			Spain	0	0	86.1188	13	0.213004	83.659	7.53951	0.111948	82.5894	0	0	81.3208	329.71	0.199384	85.3842	146.416	0.0633275	83.5615	329.71	0.167151	83.5716	2.25187
			North Macedonia	-	0	86.1188	-	0	83.659	3.65171	0.0542214	82.6436	-	-	81.3208	-	-	85.3842	176.477	0.0763294	83.6379	176.477	0.0894675	83.661	1
			Switzerland	17.2474	0.279195	86.398	-	0	83.659	2.06385	0.0306445	82.6743	714.49	0.584563	81.9054	-	-	85.3842	63.4855	0.0274586	83.6653	714.49	0.362221	84.0233	11.2544
			Croatia	2.68549	0.0434718	86.4415	4.69	0.0768454	83.7358	1.80666	0.0268256	82.7011	106.743	0.087332	81.9927	161.33	0.0975606	85.4817	51.398	0.0222305	83.6876	161.33	0.0817885	84.1051	3.13884
			Montenegro	-	0	86.4415	-	0	83.7358	1.50915	0.0224081	82.7235	-	-	81.9927	-	-	85.4817	36.7879	0.0159114	83.7035	36.7879	0.0186502	84.1237	1
			Luxembourg	0	0	86.4415	0.18	0.00294929	83.7388	1.07651	0.0159842	82.7395	0	0	81.9927	5.75	0.00347718	85.4852	36.6828	0.015866	83.7193	36.6828	0.0185969	84.1423	1
			Slovenia	3.50083	0.0566703	86.4981	8.92	0.146154	83.8849	1.0194	0.0151362	82.7546	88.1574	0.0721263	82.0648	292.08	0.176629	85.6618	25.0158	0.0108198	83.7301	292.08	0.148074	84.2904	11.6758
			Bulgaria	3.2013	0.0518216	86.5499	41.27	0.676207	84.5611	0.711079	0.0105582	82.7652	97.8924	0.080091	82.1449	1364.38	0.825077	86.4869	28.5895	0.0123655	83.7425	1364.38	0.691692	84.9821	47.7231
			Portugal	0	0	86.5499	26.1	0.427647	84.9888	0.691354	0.0102654	82.7755	0	0	82.1449	834.12	0.504415	86.9913	24.28	0.0105015	83.753	834.12	0.422869	85.4049	34.3541
			Liechtenstein	0	0	86.5499	-	0	84.9888	0.162517	0.00241309	82.7779	7.56527	0.00618956	82.1511	-	-	86.9913	4.72988	0.00204576	83.7551	4.72988	0.00239788	85.4073	1
			Andorra	-	0	86.5499	-	0	84.9888	0.0520605	0.000773004	82.7787	-	-	82.1511	-	-	86.9913	2.73282	0.00118199	83.7562	2.73282	0.00138544	85.4087	1
			Cyprus	0	0	86.5499	0	0	84.9888	5.63026e-05	8.35992e-07	82.7787	0	0	82.1511	0	0	86.9913	1.2613	0.000545535	83.7568	1.2613	0.000639434	85.4094	1
			Total	6177.53	100	100	6103.16	100	100	6734.83	100	100	122226	100	100	165364	100	100	231204	100	100	197253	100	100	0.853153
