# Supplementary material for: Identifying hotspots of greenhouse gas emissions from drained peatlands in the European Union
Source: Research Square preprint supplement (doi:10.21203/rs.3.rs-4629642/v1), 2024-07-04
Supplement: Supplementary file 4 [file ac8d539f03f59e73f59583af.xlsx]

## Sheet: SI1 Table
	Detailed Land use	Land use Classes	Albania	Andorra	Austria	Belgium	Bosnia and Herzegovina	Bulgaria	Croatia	Cyprus	Czech republic	Denmark	Estonia	Finland	France	Germany	Greece	Hungary	Iceland	Ireland	Italy	Latvia	Liechtenstein	Lithuania	Luxembourg	Montenegro	Netherlands	North Macedonia	Norway	Poland	Portugal	Romania	Serbia	Slovakia	Slovenia	Spain	Sweden	Switzerland	United Kingdom	Total
			Area [kha]
	Unkown Landuse	Cropland	2.13238e-05	0.0494206	0.0019393	0.00243247	0	0.0512602	0.000523685	0	0	1.79759	0.0496481	0.326695	0.00671951	0.0816148	0.107144	0.0624325	0.54268	0.451446	1.58492	0.897603	0	0.00120362	0	0.00241374	0.00634944	0	0.627306	3.37496	0	3.97973	0	0.0208788	0.0312853	2.52466	0.106939	0.0123318	3.20693	19.9091
	Continuous urban fabric	Buildup	0.00627931	0	0.00180786	0.240185	0	0	8.72808e-05	0	0.000551085	0.000625128	0.00153433	0.0308725	0.0123929	0.391278	0.00363448	0.0517623	4.6485e-05	0.140755	0.0301636	0.000461516	0.000157905	0.000618333	3.45981e-05	5.15176e-05	2.37167	0	0.00173099	0.732342	0.00272119	0.0328075	0	0.00324446	0	0.026887	0.00418797	0.000163497	0.713126	4.80218
	Discontinuous urban fabric	Buildup	0.101426	0	0.0323857	0.420139	0.0163541	0.04868	0.014551	0	0.0459487	0.0508654	0.0751823	0.142012	0.375135	3.42721	0.0543508	4.59064	0.013091	0.984541	0.577014	0.0838784	0.00184851	0.117353	0.00230945	0.00223295	1.41711	0.0312091	0.754664	9.44857	0.0463951	10.7838	0.0328418	0.287842	0.0329026	0.0343306	0.192512	0.0111082	3.58393	37.8343
	Industrial or commercial	Buildup	0.193309	0	0.182877	2.43707	0.06692	0.0051933	0.0733034	0	0.0332198	0.332386	0.672588	0.43138	0.353554	7.25314	0.0876596	2.99134	0.0920464	1.84462	1.04954	0.294585	0.027196	0.300734	0.00757574	0.00611743	4.15381	0.039293	0.94341	11.4093	0.0128667	4.98869	0.0238847	0.162179	0.0250008	0.0274294	0.414202	0.0167704	4.62922	45.5824
	Road and rail networks	Buildup	0.00191914	0	0.0160071	0.492587	8.72103e-05	0	0.000654606	0	0.00335788	0.0198001	0.0104555	0.0724947	0.0296786	0.562303	0.00135479	0.282745	0.0003099	0.380117	0.0298619	0.0023376	0.000520503	0.00573964	0.00151365	0.000373502	4.04761	0.000660917	0.0153961	1.76194	0.00239275	0.0789416	0.000478669	0.00822122	0.000159173	0.00123448	0.0783743	0.000119898	1.06072	8.97047
	Port areas	Buildup	0.00733723	0	0.000460073	0.057301	0	0	0.000230671	0	0	0.289573	0.000393535	0.00180426	0.0221291	0.0808241	0.00396944	0.00154873	0.00285464	0.0880271	0.0104461	0.000404733	0	2.66523e-05	0	0.00890066	0.0390181	0	0.00136014	0.01861	0.0020772	0.0750513	0	0	0	0.00319511	0.000773703	0	0.413922	1.13024
	Airports	Buildup	0.00131497	0	0	0.0111278	0	0	0.000561091	0	7.23647e-05	0.00178422	0.00230499	0.00140943	0.000431088	0.0229891	9.77012e-05	8.59907e-05	0.0267926	0.0142578	0.000616388	0.000268794	0	4.53089e-05	0	0.00133566	0.00544536	6.39597e-05	0.0363834	0.00615686	0	0.00778396	0.000929723	0	0	0	0.000583699	0	0.0482361	0.191078
	Mineral extraction sites	Buildup	0.0759147	0	0.0897096	0.0636935	0.0289354	0.000183919	0.000579794	0	0.00169884	0.0173647	0.41196	0.129919	0.0427725	0.270995	0.00101186	0.0652663	0.00194715	0.781856	0.092329	0.0555385	0.00143837	0.047866	0.000795756	0.000450779	0.0776832	0.0019972	0.180928	0.561803	0.0011996	0.266074	0.00219083	0.0232905	0.00296699	0.00653659	0.0957766	0.000686687	2.87311	6.27647
	Dump sites	Buildup	0	0	0	0.000161217	0.000186879	0	0	0	0	1.73647e-05	0.00178067	0.084213	0	0.000749536	0	0	0	0.000183407	0	0.000167827	0	5.33046e-05	0	0	0.000172676	0.000648125	0.00029158	0.00421109	0	0	0.00028536	0	0	0	0.0147736	0	0.000376869	0.108272
	Construction sites	Buildup	0	0	0	0	0	0	0	0	0	0	0	0	0	0	0	0	0	0	0	8.39133e-05	0	0	0	0	0	0	0	1.86066e-05	0	0	0	0	0	0	0	0	4.83166e-06	0.000107352
	Green urban areas	Grassland	0	0	0.0191515	1.17664	0	0	0	0	0.0148351	0.229782	0.437243	0.052449	0.0718069	6.24244	0	0.315001	0.000689527	1.74241	0.0443558	0.362958	0.000643318	0.0578458	0.000955772	0	2.84676	0	0.190424	4.58142	0	0.0714207	0	0.0486931	0.00118918	0	0.136264	0.000277945	5.77394	24.4196
	Sport and leisure	Grassland	0.0136437	0	0.0115929	0.386061	0.000429822	0	0.0206856	0	0.00524235	1.27871	0.0165593	0.00202644	0.0385373	6.41911	0.00247778	0.273722	0.048192	1.72187	0.0306365	0.0559644	0	0.0421773	8.21705e-05	0.00172325	6.21918	0.000119391	0.0292622	2.70966	0	0.0671895	0.00121117	0.00124926	0	0.000467971	0.0179513	0.000621288	7.30976	26.7261
	Non-irrigated arable land	Cropland	11.7357	0.000133225	0.382418	1.10496	3.4895	0.0298944	0.184717	0	0.0999472	4.44352	2.58851	0.662555	0.820049	25.0098	2.26116	6.41599	0.336807	4.80905	2.45447	2.33348	0.0189542	2.92246	0.0156136	0.319843	2.55041	2.00983	1.17686	36.8594	0.1231	10.765	1.14432	0.316671	0.00390083	1.03183	0.306949	0.040596	10.854	139.622
	Irrigated arable land	Cropland	0	0	0	0	0	0	0	0	0	0	0	0	0	0	0.0243568	0	0	0	0	0	0	0	0	0	0	0	0	0	0.00326925	0	0	0	0	8.06847e-06	0	0	0	0.0276341
	Rice fields	Cropland	0.00171301	0	0	0	0	0	0	0	0	0	0	0	0	0	0.0138408	0	0	0	0.00233461	0	0	0	0	9.65955e-05	0	0.447669	0	0	0.000271488	0.00103798	0	0	0	0.0008956	0	0	0	0.467859
	Vineyards	Cropland	0.128328	0	0.00025042	0	0.00322055	0.000145867	0.00425806	0	1.1133e-05	0	0	0	0.31833	0.00437146	0.0259503	0.077632	0	0	0.14195	0	0	0	2.59486e-05	0.000535388	0	0.00199454	0	0	0.00568247	0.781783	0.00187786	0.000412317	0	0.162635	0	0	0	1.65939
	Fruit & berry plantations	Cropland	0.196352	0	8.1532e-05	9.9575e-05	0.00644436	0.000171235	0.0279299	0	0	0	0	0	0.00202364	0.0212184	0.133934	0.0129498	0	0	0.101267	0	8.77252e-05	0	0	0.118471	0.000313956	0.00133889	0	0.0203697	0.000505093	0.0344617	0	0	0	0.108905	0	0	0	0.786925
	Olive groves	Cropland	0.00461351	0	0	0	0	0	4.98748e-05	0	0	0	0	0	0	0	0.00668611	0	0	0	0.0472369	0	0	0	0	0.000998153	0	5.96957e-05	0	0	0	0	0	0	0	0.478261	0	0	0	0.537905
	Pastures	Grassland	1.25392	0.00233537	3.47952	3.89365	5.17336	0.00946794	0.192591	0	0.960982	27.5028	4.77858	0.0483847	6.9443	115.201	0.232241	16.5718	45.1771	183.686	1.92316	6.2303	0.0710614	9.15066	0.152052	0.272135	13.3063	0.255287	0.188669	47.009	0.040857	20.0188	3.78379	3.49893	0.116851	0.645576	0.213146	1.71906	253.622	777.326
	Complex cultivation patterns	Cropland	2.40531	0	0.0763711	1.3592	0.641806	0.0277002	0.55818	0	0.0554491	0.362713	0.341021	7.6811e-05	2.76103	1.80141	0.61568	7.17273	5.42325e-05	0.00346648	2.83515	2.03935	0.00739764	5.17288	0.00773219	0.255017	0.0372026	0.198387	0.00455474	26.1059	0.193998	19.8836	1.00461	0.166815	0.0415487	0.21654	0.0187128	0.014196	0.490009	76.8758
	Mixed agriculture and nature	Cropland	1.69456	0.000107849	0.919811	6.29554	2.32889	0.0682676	0.503455	0	1.45464	35.957	72.4931	22.6775	5.01226	36.0772	0.735962	13.0498	5.18202	5.68293	2.05144	33.483	0.0291119	46.0368	0.199514	0.537916	0.620206	0.737027	70.4686	72.4665	0.118925	63.8724	3.91621	3.85211	0.199354	0.417403	9.45909	0.275938	13.3643	532.239
	Broad-leaved forest	Forestland	0.913252	0.0036288	1.00756	19.4358	0.691387	0.835825	0.522806	0	1.62424	25.0816	151.562	30.2427	24.0537	225.58	0.61753	52.2234	7.07779	57.6961	23.9348	104.233	0.0068704	115.736	0.317928	1.19539	14.8993	0.462543	80.7057	165.508	0.164589	162.37	11.0466	6.58059	0.883384	2.193	27.7863	0.09316	93.2464	1410.53
	Coniferous forest	Forestland	0.0528002	0.0404818	4.26436	4.69403	0.0788393	2.21508	0.263825	0.0655903	14.9407	1.6786	258.685	376.349	8.99609	114.363	0.0319454	0.966874	1.28784	156.11	20.2092	116.394	0	56.76	0.0407983	0.00747508	0.362079	0.0033778	106.615	298.526	0.15162	7.39547	0.246003	14.9585	0.719001	1.97013	180.396	1.99752	176.85	1928.69
	Mixed forest	Forestland	0.00280052	0.000120537	0.657868	0.936836	0.0210099	0.278233	0.133396	0	0.925016	0.662761	117.492	244.777	1.97467	21.0144	0.0126109	1.04101	0.273413	0.706209	3.78358	56.8888	0.000497109	46.1311	0.0590232	0.000225389	0.0841568	5.96957e-05	42.2508	56.6472	0.0186048	5.975	0.0299703	4.68233	0.938379	0.055744	45.8452	0.289299	2.00498	656.594
	Natural grasslands	Wetland	0.88772	0.336642	1.03997	0.0279838	0.15277	0.781042	0.109712	0	0.0392103	0.789784	0.00938484	0.006479	6.47548	0.423478	0.136908	0.00217563	19.4251	18.2159	12.2874	0.00511719	0	0.00503185	0	0.0115305	0.123378	0.127723	0.060922	0.173168	0.0567676	1.04084	1.01154	0.513435	0.00327592	0.192304	0.0709558	0.397943	286.893	351.834
	Moors and heathland	Wetland	0.156068	0.0512195	0.862468	3.60407	0.0157947	0.378244	0.013223	0.00617342	0.12411	0.48371	0.264742	47.3272	3.5398	4.49685	0.122902	0.000456549	205.901	210.825	9.64421	0.443745	0	0.046544	0.000160016	0.153133	1.50592	0.0404338	535.827	0.17814	0.489533	1.08123	0.0396646	0.908992	0.0459327	2.3332	37.9052	0.354029	2754.73	3823.9
	Sclerophyllous vegetation	Forestland	0.253199	0	0	0	0.0884924	9.51306e-05	0.111832	0	0	0	0	0	8.98101e-05	0	0.0511102	0	0	0	0.00500006	0	0	0	0	0.0156956	0	0.000119391	0	0	0.0023551	0.000453372	0	0	0	1.10862	0	0	0	1.63706
	Transitional wood-shrub	Forestland	0.412767	0.0186886	0.661022	0.0614229	1.18142	0.615799	0.408718	0.00177368	2.0824	4.21411	125.586	420.218	1.62843	5.23185	0.104696	5.45665	12.6998	3.13283	5.58046	62.5077	0.00466962	18.2877	0.000882251	0.212596	0.0169903	0.0915855	221.982	2.16811	0.161529	13.0467	1.84779	1.63549	0.0334759	0.455352	70.2909	0.258923	1.35724	983.657
	Beaches. dunes. sand	Forestland	0.0751036	0	0.00194512	0.0402493	0.000666241	0	0.000897746	0	0	0.471229	0.00385937	0.0559625	0.0424557	0.0904222	0.0029992	0.00300588	2.23477	0.204896	0.0387144	0.00924671	8.77252e-05	0.000783577	0	0.00931229	0.0229835	0.000174823	0.0287512	0.00629641	0.00131324	0.242651	0	0	0	0.00975289	0.00561814	0.000163497	0.984837	4.58915
	Bare rocks	Forestland	0	0.0173055	0.00283513	0	0.000394166	0.152841	0	0.000570037	0	0.000173647	8.64912e-06	0.0191209	0.3759	0	0.000293104	0	1.32082	0.124557	8.36338	8.39133e-05	0	0	0	0	0	0	2.11065	0	0.00213799	0.00493779	0.000983057	0.167102	0.00963442	0.275407	1.11538	0.000795685	2.89288	16.9582
	Sparsely vegetated	Forestland	0.0637961	0.0648572	0.0461017	0.00019915	0.0270677	0.171872	0.0527114	0.026334	0.000562218	0.00332099	0.0108183	1.60925	1.45786	0.00311888	0.00155019	0	73.9468	1.06687	8.53755	0.00739151	0	0.000234428	0	4.50779e-05	0.000387212	0.000601221	123.31	0.00234909	0.0293602	0.217259	0.0132539	0.44284	0.0562174	0.284867	3.09902	0.00725875	69.1974	283.759
	Glaciers and snow	Snow	0	0	0	0	0	0	0	0	0	0	0	0	0	0	0	0	0	0	0.695808	0	0	0	0	0	0	0	0.0440853	0	0	0	0	0	0	0	0.0168439	0	0	0.756737
	Inland marshes	Wetland	0.449414	0	6.6875	0.609606	1.17572	0.000375734	0.887696	0	0.10557	17.4816	36.3058	13.0725	1.30276	34.3989	1.13687	14.4063	1.511	109.913	1.64649	8.96204	7.60285e-05	5.44181	0.00282077	2.62599	6.60721	0.0443539	0.982228	6.8842	0.000792498	135.277	0.588523	0.0528597	0.000432951	0.000346944	1.79556	0.00747413	139.668	550.034
	Peat bogs	Wetland	0	0.000139569	0.0231674	0.0440197	0.000523262	0	0	0	0.394595	2.13829	93.2733	1848.05	0.0162324	4.2408	0	0	677.697	192.447	0.00197929	85.1498	0	6.9951	0	0.000186751	0.511972	0	1364.32	0.259186	0	0.00361129	0.00551643	0.020896	0	0	42.606	0.00636693	88.4127	4406.62
	Salt marshes	Wetland	0.649603	0	0	0.0832458	0.000105898	0	0.0233289	0	0	6.69789	0.00505068	0.254832	0.779335	1.17579	2.40429	0	0.0775062	0.531688	0.0188504	0.000167827	0	0.00558069	0	0.125898	0.0125256	0	0.00909314	0.0417643	0.00693742	0.573927	0	0	0	0.000346944	0.0104143	0	1.27215	14.7603
	Intertidal flats	Wetland	0	0	0	0.000961307	0	0	0	0	0	0.00425434	0	6.97171e-05	0.00433721	0.000367222	0	0	0.0947153	0.0056841	0	0	0	0	0	0	8.89542e-05	0	0.00701296	0	0	0	0	0	0	0	5.1901e-05	0	0.0949403	0.212483
	Water courses	Wetland	0.022505	0	0.151801	0.0985659	0.0567872	0.00377056	0.00678297	0	0	0.0562659	0.00489147	0.116071	0.121112	0.447664	0.0808187	0.374753	0.0723447	0.151504	0.0885536	0.0140618	0.00132757	0.00141727	0	0.0211859	0.475999	0.00048183	0.0567397	0.0952298	0.00119328	0.840483	0.0270942	0.000535397	0.000738564	0.000532519	0.00603298	0.000348793	0.268931	3.66652
	Water bodies	Wetland	0.0303487	0.0423933	1.20533	0.5656	1.01199	0.0999691	0.0112218	0	0.267833	1.38374	0.800258	7.9236	0.958249	5.71988	0.278259	7.92684	0.526226	9.66737	1.73798	2.43166	0.00146763	1.62131	0.000168666	0.994792	4.24804	0.373523	4.63854	24.558	0.0407223	26.8377	2.17761	0.105362	0.000210109	0.0185216	0.797077	0.034196	10.0308	119.067
	Coastal lagoons	Wetland	0.237951	0	0	0.0025036	0	0	0	0	0	0.0639975	8.21667e-05	0.000131213	0.0418246	0.0261382	0.586552	0	0.00555727	0.00651404	0.00363986	0.00112351	0	0	0	0.0128042	0.00236514	0	0.000627339	1.40376	0.0198468	0.275285	0	0	0	0.000814915	0.000109569	0	0.026549	2.71818
	Artificial land	Buildup	0	0	0.00318061	0.0621496	0	0.000120499	0.000467576	0	0.00120624	0.0061167	0.00477272	0.00286804	0.0156451	0.256427	0.000358238	0.0742198	0	0.172235	0.0404643	0.0110399	5.84834e-06	0.0162943	0.000577203	0	0.182226	0	0	0.678949	0.000284115	0.181939	0	0.0149197	0.000458419	0.00139584	0.00996675	0	0.7458	2.48409
	Common wheat	Cropland	0	1.90322e-05	0.192217	0.90709	0	0.127758	0.049083	0	0.319778	2.06095	18.2055	23.2117	3.33807	77.1799	0.231589	20.1858	0	5.1758	5.10878	22.4477	0.00375932	45.2383	0.0142006	0	6.27155	0	0.0181188	234.917	0.00497897	41.3936	0	1.11486	0.030525	0.111909	4.17238	0	82.7482	594.781
	Durum wheat	Cropland	0	0	0	0	0	0	0.00754356	0	0	0	0	3.33266e-06	0.00511864	9.55784e-05	0.472864	0.000292368	0	5.09465e-05	0.224917	6.0604e-05	0	2.93175e-05	0	0	0	0	0	0.000769074	0.00208982	0.000477233	0	0.000627707	0	0.021308	6.72791e-05	0	5.79799e-05	0.736372
	Barley	Cropland	0	0	0.0233897	0.158702	0	0.00142062	0.0126869	0	0.0594028	1.83711	5.23564	21.9626	0.642468	22.6619	0.790658	2.25961	0	4.66164	0.64853	4.92006	8.76944e-05	5.60906	0.00409619	0	2.03444	0	0.00321596	38.8616	0.0219307	1.28153	0	0.0941885	3.82016e-05	0.311403	0.812037	0	25.2509	140.16
	Rye	Cropland	0	0	0.00167723	0.00174097	0	0	0	0	0.0107995	0.0604594	0.0597155	0.0830665	0.0146881	10.5962	0.000371265	0.0781145	0	0.011137	0.00380488	0.255324	0	0.999587	0.000207589	0	0.0297909	0	1.32536e-05	68.2961	0.000290429	0.388853	0	0.0196972	0.000805557	0.000726162	0.0123574	0	0.0804911	81.006
	Oats	Cropland	0	0	6.40609e-05	0.00110955	0	8.24465e-05	3.74061e-05	0	0.00038409	0.051712	0.902324	0.608301	0.000347266	0.13791	0.0013613	0.00339855	0	0.0154578	0.00316768	0.763252	0	0.465751	0	0	0.0151987	0	0.000119283	10.5036	0.000157842	0.00590576	0	0.00107079	0	0.0088465	0.0590642	0	0.191852	13.7405
	Maize	Cropland	0	0	0.489356	3.63163	0	0.113572	0.0111283	0	0.157804	2.03493	4.5752	28.6092	3.96012	165.005	0.93293	35.2523	0	6.68674	12.2996	3.95714	0.00673084	8.05434	0.0162949	0	13.4605	0	0.0226943	128.662	0.0270787	75.1239	9.20518e-06	1.16856	0.04951	0.0373391	3.23462	0	71.4032	568.984
	Triticale	Cropland	0	0	2.32949e-05	5.21583e-05	0	0	0	0	1.66996e-05	0	0.000164333	4.66629e-05	0.000443063	0.0835909	0	0.0013873	0	5.09527e-05	0	0.003085	0	0.0637956	0	0	0.000606982	0	0	1.5145	0	0.000864986	0	7.38479e-05	0	0	1.15336e-05	0	0.000386532	1.6691
	Other cereals	Cropland	0	0	0	2.845e-05	0	0	0	0	0	8.68233e-06	0.145275	0.00014997	0	0.00120731	0	5.15944e-05	0	0	0	0.228304	0	0.88795	0	0	0.000188374	0	0	0.0184552	0	0.000137205	0	0	0	0	0.000213371	0	0.0136703	1.29564
	Potatoes	Cropland	0	0	0.0120594	0.26197	0	0.000767387	3.11717e-05	0	0.00532918	0.0548376	0.227086	1.14529	0.0959615	7.4036	0.00201916	0.210609	0	0.239717	0.058009	0.202047	5.84834e-06	0.5004	0.00081738	0	2.69525	0	0.000547817	4.05114	2.52547e-05	0.879716	0	0.0107311	0.000171907	0.000193643	0.0438133	0	8.16098	26.2631
	Sugar beet	Cropland	0	0	0.0178172	0.0954736	0	0.000234656	0	0	0.0127456	0.00576073	0.00682682	2.84627	0.321593	6.85503	0.00238442	0.695318	0	0.0191103	0.208147	0.0172978	0.000345052	0.552728	0.000220563	0	1.84818	0	0.00326352	11.2341	0	0.491392	0	0.0417457	0.000127339	6.45477e-05	0.206384	0	5.99728	31.4798
	Other roots crops	Cropland	0	0	1.16474e-05	0.00264585	0	0	0	0	0	3.03882e-05	0	6.61191e-06	0.000941042	0.0140148	0.0100597	0.0283858	0	0.00775763	0.000342438	1.86474e-05	0	0.000597011	0	0	0.138166	0	0	0.0131888	0	0.00042951	0	0	0	2.42054e-05	0.000197993	0	0.446985	0.663804
	Other non permanent industrial crops	Cropland	0	0	0	0.00965831	0	0	0.00378425	0	0	0.00144995	0.000618412	0.00258132	0.0298071	0.0220082	0.930565	0.00151927	0	0.00747301	0.08402	0.000406099	0	0.000999461	2.59486e-05	0	0.0156847	0	0	0.00386075	8.20777e-05	0.000190893	0	0	0	0.00442781	0.00143344	0	0.391464	1.51206
	Sunflower	Cropland	0	0	0.0346447	0.0600476	0	0.0719674	0.00418948	0	0.0129179	0.0265375	0.129194	3.01059	0.132293	0.796707	4.86599	11.6109	0	0.306396	1.09384	0.206698	0.000157905	0.2722	0.000397857	0	0.212619	0	0.000617154	4.51149	0.00452073	22.3064	0	0.0561848	0.0016745	0.0665104	0.131073	0	1.78349	51.7102
	Rape and turnip rape	Cropland	0	0	0.00661989	0.0246242	0	0.00959802	6.23435e-06	0	0.0610004	0.232031	1.29965	0.43669	0.555775	11.9441	0.0470321	5.93682	0	0.289861	0.299474	2.47353	0	4.78523	0.00257695	0	0.149149	0	0	43.6336	3.15683e-05	7.33474	0	0.26079	0.000382016	6.45477e-05	0.152281	0	8.08552	88.0212
	Soya	Cropland	0	0	0.000291186	0.00103368	0	1.90261e-05	0	0	2.22661e-05	0.00100281	0.00443718	0.320516	0.00153276	0.0135923	8.46744e-05	0.0920236	0	0.0098458	0.260829	0.00676346	2.33934e-05	0.0142595	0	0	0.00196706	0	0.00180844	0.112416	0	0.0680826	0	8.61559e-05	7.64032e-05	7.26162e-05	0.000661257	0	0.0564868	0.967933
	Dry pulses. vegetables and flowers	Cropland	0	0	0.00463736	0.0510203	0	0.000107815	0.0250122	0	0.0111558	0.0246708	1.1961	0.291472	0.104996	1.42533	0.47768	0.372963	0	0.132178	0.702656	2.53943	0	7.01804	0.000497348	0	0.240826	0	0	5.35128	0.0154597	0.363399	0	0.00717425	0.000114605	0.0274512	0.0198959	0	4.86747	25.271
	Other fodder crops (excl. temp. grasslands)	Cropland	0	0	0.0135389	0.021617	0	0.00110711	0.0121009	7.03843e-06	0.0145737	0.0587403	0.587159	3.0257	0.0758426	0.848445	0.79643	0.690597	0	0.0615128	0.889537	0.583883	0	0.741121	0.000449775	0	0.112565	0	0.00020764	2.2216	0.00889309	2.22042	0	0.0549221	0.00356114	0.0459992	0.0699829	0	1.48458	14.6451
	Bare arable land	Cropland	0	0	0.000914323	0.0322087	0	1.26841e-05	0.0284162	0	0.000846111	0.0160363	0.0467446	0.0177166	0.0240503	0.474572	2.67393	0.139133	0	0.667417	0.415075	0.0134564	0	0.00335034	0.000233537	0	0.0951144	0	0	0.0483016	0.0540363	0.0212439	0	0.000110772	0	0.612031	0.0100198	0	8.20287	13.5978
	Woodland and shrubland type of vegetation (Mixed forest)	Forestland	0	0	0	0	0	0	0	0	0	0	0	0	0	0	0	0	0	0	0	0	0	0	0	0	0	0	0	0	0	0	0	0	0	0	0	0	0	0
	Grassland (permanent and temporary)	Grassland	0	4.44084e-05	3.8852	20.2759	0	0.197506	0.160229	4.92642e-05	4.6961	96.9461	123.993	79.3817	28.225	912.618	1.36208	62.0666	0	296.424	6.8871	77.732	0.0241512	121.639	0.660511	0	184.334	0	0.0338106	351.722	0.0637239	169.375	0.0146584	12.6466	0.538285	0.703885	19.1797	0.000828384	899.361	3475.15
	Bare land and lichens/moss	Cropland	0	0	0.0112909	0.00936157	0	1.90261e-05	1.8703e-05	0	0.00679766	0.0307789	0.00229141	0.00156831	0.043115	0.318085	0.00377033	0.203651	0	0.107836	0.0176582	0.0467572	0	0.0301289	0	0	0.0500764	0	0	0.196605	0.0014463	1.39235	0	0.000264622	0	6.45477e-05	0.000351773	0	0.104479	2.57876
	Wetland	Wetland	0	0	0	0	0	0	0	0	0	0	0	10274.9	0	0	0	0	0	0	0	0	0	0	0	0	0	0	0	0	0	0	0	0	0	0	6480.43	0	0	16755.3
	Total	All	22.029	0.627537	26.5232	73.7541	16.2591	6.2984	4.44324	0.100498	28.551	236.945	1022.51	13454.6	106.167	1838.74	23.483	274.241	1055.58	1278.13	138.83	599.297	0.208681	511.782	1.51109	6.91488	278.46	4.87056	2557.65	1680.07	1.90659	813.721	26.9619	53.952	3.77157	16.5395	6931.35	5.54017	5055.25	38157.5
